# Supplementary material for: Reconstruction of the ocular surface by autologous transplantation of rabbit adipose tissue-derived stem cells on amniotic membrane
Source: PubMed Central journal article supplement — Ann Transl Med. 2020 Sep;8(17):1062. doi: 10.21037/atm-20-4368 (PMC7575941; doi:10.21037/atm-20-4368), 2020-09
Supplement: atm-08-17-1062-dss.pdf [file atm-08-17-1062-dss.pdf]

## Data Sharing Statement

|                     |                                                                                                                                                    |                                                                                                                               |
|---------------------|----------------------------------------------------------------------------------------------------------------------------------------------------|-------------------------------------------------------------------------------------------------------------------------------|
| <b>Article Info</b> | <a href="http://dx.doi.org/10.21037/atm-20-4368">http://dx.doi.org/10.21037/atm-20-4368</a>                                                        |                                                                                                                               |
| <b>Item</b>         | <b>Question</b>                                                                                                                                    | <b>Authors' Response<br/>(place "-" if not applicable)</b>                                                                    |
| 1                   | Would you like to share data collected for your study to others?                                                                                   | Yes.                                                                                                                          |
| 2                   | If not, would you like to share the reason for your decision?                                                                                      | -                                                                                                                             |
| 3                   | What data in particular will be shared?                                                                                                            | All.                                                                                                                          |
| 4                   | Any other documents will be share? Such as study protocol, statistical analysis plan, informed consent form, clinical study report, analytic code. | Yes.                                                                                                                          |
| 5                   | When will data availability begin?                                                                                                                 | From the publication of the article.                                                                                          |
| 6                   | When will data availability end?                                                                                                                   | Two years within the publication date, since the technique or survival date may be updated over time.                         |
| 7                   | To whom will you share the data?                                                                                                                   | Everyone who wants it.                                                                                                        |
| 8                   | For what type of analysis or purpose?                                                                                                              | For reference.                                                                                                                |
| 9                   | How or where can the data/documents be obtained?                                                                                                   | Emails could be sent to the address below to obtain the shared data: <a href="mailto:ting_qiu@sina.com">ting_qiu@sina.com</a> |
| 10                  | Any other restrictions?                                                                                                                            | No, thank you.                                                                                                                |
